# Supplementary material
Source: HighWire-hosted journal article supplement (https://ard.bmj.com/content/77/12/1838)
Supplement: inline-supplementary-material-11 [file inline-supplementary-material-11.docx]

| ***Supplementary table S7:* Laboratory examination After IL-2 and Non IL-2 therapy** | | | | | | |
| --- | --- | --- | --- | --- | --- | --- |
| **Median** | **After Non IL-2 therapy** | **After IL-2 therapy** | ***n1*** | ***n2*** | ***Z/χ2*** | ***P*** |
| WBC (*109/L) | 6.64(4.72, 8.89) | 5.65(5.42, 15.49) | 70 | 82 | -0.303 | 0.762 |
| RBC (*1012/L) | 4.01(3.75, 4.44) | 4.27(1.87, 4.27) | 70 | 82 | -0.445 | 0.656 |
| HB (g//L) | 122(111, 132) | 132(79, 134) | 70 | 82 | -1.266 | 0.205 |
| PLT (*109/L) | 181(130, 241) | 142.5(73, 267) | 70 | 82 | -2.242 | 0.025 |
| LY (*109/L) | 1.93(1.30, 2.59) | 1.75(1.00, 3.75) | 70 | 82 | -1.767 | 0.077 |
| NEUT (*109/L) | 3.64(2.01, 5.99) | 4.17(3.37, 4.17) | 70 | 82 | -0.181 | 0.856 |
| ALT (U/L) | 21.2(17.20, 41.40) | 17.15(13.70, 17.15) | 37 | 45 | -1.23 | 0.219 |
| AST (U/L) | 20.5(15.75, 33.13) | 17.8(16.40, 17.80) | 38 | 46 | -0.207 | 0.836 |
| BUN (mmol/L) | 4.02(3.20, 5.35) | 8.1(3.90, 8.10) | 38 | 45 | -0.320 | 0.749 |
| CREA (μmol/L) | 60(51.00, 67.00) | 67(57.00, 67.00) | 38 | 44 | -0.489 | 0.625 |
| K (mmol/L) | 3.83(3.61, 3.94) | 3.24(3.24, 3.24) | 33 | 38 | -0.824 | 0.410 |
| CO2-CP (mmol/L) | 26.9(25.5, 28.9) | 28.6(27.20, 28.60) | 37 | 38 | -0.064 | 0.949 |
| Urine PH | 5(5.00, 7.00) | 5(5.00, 5.00) | 13 | 17 | -0.936 | 0.349 |
| Urine Pro (+/-) | 0/13 | 2/17 | 13 | 17 | - | 0.502 |
| Urine BLD (+/-) | 0/13 | 0/17 | 13 | 17 | - | - |
| Complement C3 (g/L) | 0.17(0.17, 0.17) | 0.17(0.17, 0.17) | 5 | 6 | 0.369 | 0.712 |
| Complement C4 (g/L) | 15.3(13.55, 20.05) | 11.6(11.60, 11.60) | 5 | 6 | 0.370 | 0.711 |
| IgG (g/L) | 15.5(13.8, 17.92) | 11.00(9.22, 23) | 8 | 14 | 1.502 | 0.133 |
| - Median (range). Within-group comparisons were made using the Mann-Whitney U test. - Abbreviation: WBC, white blood cell. RBC, red blood cell. HB, hemoglobin. PLT, platelets. LY, lymphocyte. NEUT, neutrophil. ALT, Alanine aminotransferase. AST, aspartate transaminase. BUN, urea nitrogen. CREA, creatinine. K, kalium. CO2-CP, carbon dioxide combining power. Urine Pro, urine protein. Urine BLD, urine blood. | | | | | | |
